# Supplementary material
Source: publisher figshare collection journal article supplement (https://frontiersin.figshare.com/ndownloader/files/34271099)

RNASEH2A

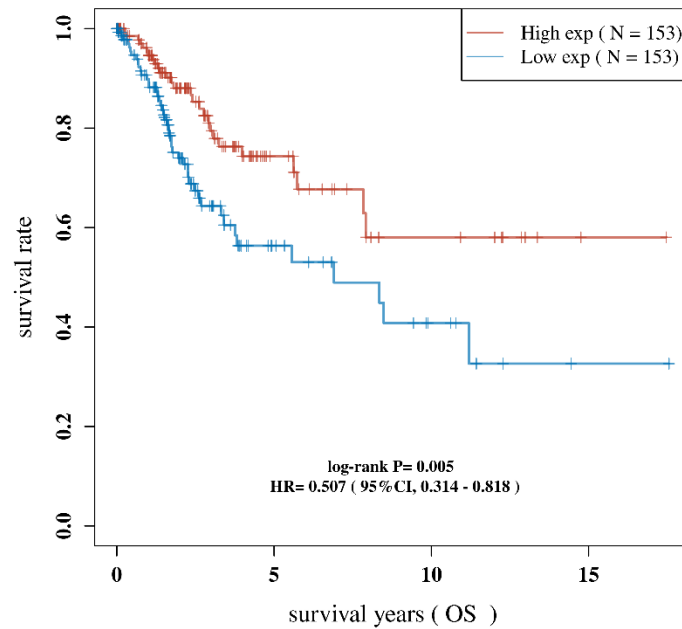

CETN2

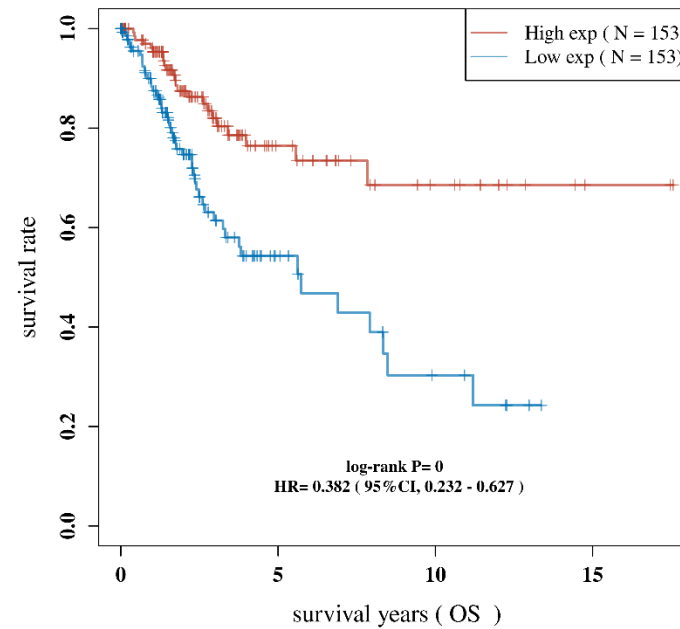

HAPI

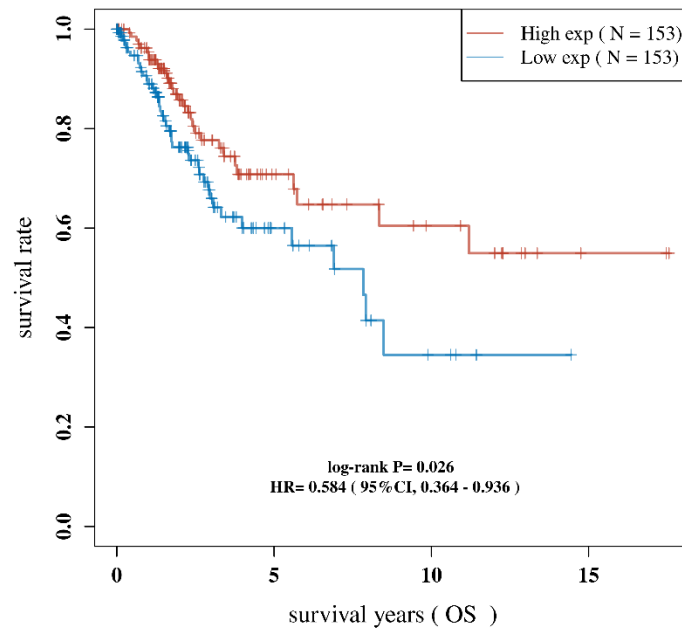

MCM5

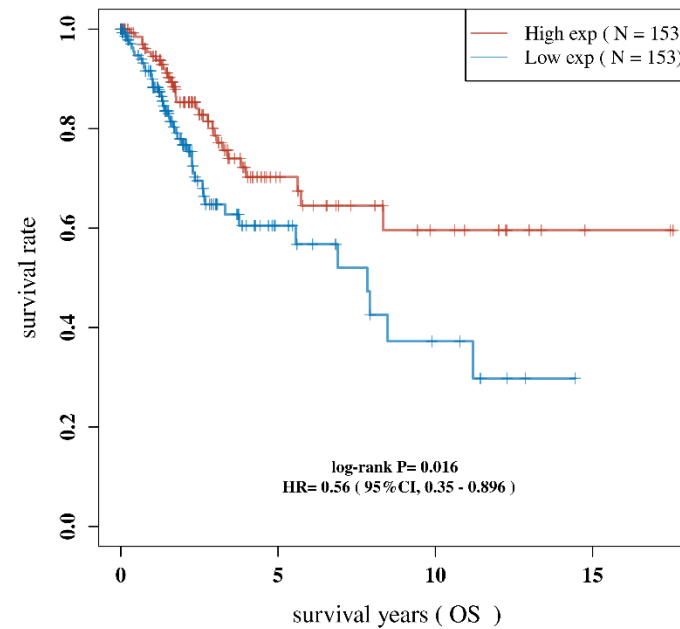

Supplement: Supplementary file [file 34271099]
